# Supplementary material for: How Does Urban Green Space Impact Residents’ Mental Health: A Literature Review of Mediators
Source: MDPI journal article supplement (doi:10.3390/ijerph182211746), 2021-11-09
Supplement: s1 [file s1]

**Supplement**  
**Table S1. Quality assessment tool**

| NO. | Item                               | Description                                                                                                          | Scale                                                                                                                                                                            |
|-----|------------------------------------|----------------------------------------------------------------------------------------------------------------------|----------------------------------------------------------------------------------------------------------------------------------------------------------------------------------|
| 1   | Study Design                       | Was the study design clearly identified, and is the rationale for choice of design evident?                          | 1: The design was appropriate for the study question<br>0.5: Insufficiently described<br>0: The design was not appropriate for the study question                                |
| 2   | Population - Selection bias        | Are the individuals selected to participate in the study likely to be representative of the target population?       | 1: Likely to be representative<br>0.5: Insufficiently described<br>0: Unlikely to be representative                                                                              |
| 3   | Population –Inclusion bias         | Is there evidence of bias in the percentage of selected individuals who provided data for inclusion in the analysis? | 1: No evidence of bias<br>0.5: Insufficiently described<br>0: Evidence of bias                                                                                                   |
| 4   | Green space measure - derivation   | Was derivation of the green space variable well described?                                                           | 1: Derivation of green space measure well described<br>0.5: Insufficiently described<br>0: Derivation of green space measure not described                                       |
| 5   | Green space measure - type         | Did the green space measure include information on type of green space?                                              | 1: Green space measure included information on type of green space<br>0.5: Insufficiently described<br>0: Green space measure did not include information on type of green space |
| 6   | Quality of green space             | Quality of green space was measured and included in analysis                                                         | 1: Measured quality of green space<br>0.5: Insufficiently described<br>0: Did not measure quality of green space                                                                 |
| 7   | Mental health measure - derivation | Was derivation of the mental health variable well described?                                                         | 1: Derivation of mental health measure well described<br>0.5: Insufficiently described<br>0: Derivation of mental health measure not described                                   |

|    |                         |                                                                                                                         |                                                                                                                                                             |
|----|-------------------------|-------------------------------------------------------------------------------------------------------------------------|-------------------------------------------------------------------------------------------------------------------------------------------------------------|
| 8  | Statistical methodology | Was an appropriate statistical methodology used?                                                                        | 1: Evidence of appropriate methodology<br>0.5: Insufficiently described<br>0: No evidence of appropriate methodology                                        |
| 9  | Outcome - reliable      | Were the outcome measures reliable                                                                                      | 1: gave the same information over different situations<br>0.5: Insufficiently described<br>0: gave the different information over different situations      |
| 10 | Outcome - valid         | Were the outcome measures valid?                                                                                        | 1: the measure assessed what it was intended to measure.<br>0.5: Insufficiently described<br>0: the measure did not assess what it was intended to measure. |
| 11 | Effect size             | Was an effect size (estimate and confidence interval/standard error) reported for green space variable?                 | 1: Effect size reported for green space<br>0.5: Insufficiently described<br>0: Effect size not reported for green space                                     |
| 12 | Mediator                | Have any mediators been reported?                                                                                       | 1: Mediators were reported<br>0.5: Insufficiently described<br>0: No mediators were reported                                                                |
| 13 | Heterogeneity           | Is there any discussion about individual or social characteristics?                                                     | 1: Heterogeneity was discussed<br>0.5: Insufficiently described<br>0: No Heterogeneity was discussed                                                        |
| 14 | Level of analysis       | Was analysis of green space access in relation to outcome carried out at individual level or at ecological (area) level | 1: Individual level<br>0.5: Insufficiently described<br>0: Ecological level                                                                                 |

**Table S2.** Quality assessment score

[illegible]

|                         |     |     |      |      |     |     |      |     |     |      |      |     |     |     |
|-------------------------|-----|-----|------|------|-----|-----|------|-----|-----|------|------|-----|-----|-----|
| Statistical methodology | 1   | 1   | 1    | 1    | 0.5 | 0.5 | 1    | 1   | 1   | 0.5  | 1    | 1   | 0.5 | 1   |
| Outcome - reliable      | 1   | 1   | 0.5  | 1    | 1   | 1   | 1    | 1   | 1   | 1    | 1    | 1   | 1   | 1   |
| Outcome - valid         | 0.5 | 0.5 | 1    | 0.5  | 0.5 | 0.5 | 1    | 0.5 | 0.5 | 1    | 0.5  | 0.5 | 0.5 | 0.5 |
| Effect size             | 1   | 1   | 1    | 1    | 0.5 | 1   | 1    | 1   | 1   | 1    | 1    | 1   | 1   | 1   |
| Mediator                | 1   | 1   | 0.5  | 0.5  | 1   | 0.5 | 1    | 0.5 | 0.5 | 0.5  | 1    | 0   | 1   | 0.5 |
| Heterogeneity           | 1   | 1   | 0    | 1    | 1   | 0   | 0    | 0.5 | 0   | 0.5  | 1    | 1   | 1   | 0.5 |
| Level of analysis       | 1   | 1   | 1    | 1    | 1   | 1   | 1    | 1   | 1   | 1    | 1    | 1   | 1   | 1   |
| <b>SUM</b>              | 12  | 11  | 10.5 | 11.5 | 10  | 9   | 10.5 | 10  | 10  | 10.5 | 11.5 | 11  | 12  | 9   |

| <b>Reference No.</b>               | [115] | [116] | [42] | [51] | [45] | [43] | [29] | [117] | [47] | [22] | [17] | [27] | [76] | [32] |
|------------------------------------|-------|-------|------|------|------|------|------|-------|------|------|------|------|------|------|
| Study Design                       | 1     | 1     | 1    | 1    | 1    | 1    | 1    | 1     | 1    | 1    | 1    | 1    | 1    | 1    |
| Population - Selection bias        | 1     | 1     | 1    | 1    | 1    | 1    | 1    | 0.5   | 0.5  | 1    | 1    | 1    | 1    | 1    |
| Population –Inclusion bias         | 0.5   | 0     | 0.5  | 0.5  | 0.5  | 0.5  | 0.5  | 0.5   | 0.5  | 0.5  | 0.5  | 0.5  | 0.5  | 0    |
| Green space measure - derivation   | 1     | 0.5   | 1    | 1    | 0.5  | 0.5  | 1    | 1     | 1    | 1    | 0.5  | 1    | 1    | 1    |
| Green space measure - type         | 1     | 0.5   | 1    | 0    | 1    | 1    | 1    | 1     | 1    | 1    | 0.5  | 0.5  | 0.5  | 0.5  |
| Quality of green space             | 0     | 0     | 0.5  | 0    | 0    | 1    | 0    | 0     | 0    | 0    | 0    | 0    | 0    | 0    |
| Mental health measure - derivation | 0.5   | 1     | 1    | 1    | 1    | 0.5  | 1    | 1     | 1    | 1    | 1    | 1    | 1    | 1    |
| Statistical methodology            | 1     | 1     | 1    | 1    | 1    | 1    | 1    | 1     | 1    | 1    | 1    | 1    | 1    | 1    |
| Outcome - reliable                 | 1     | 1     | 1    | 1    | 1    | 1    | 1    | 1     | 1    | 1    | 1    | 1    | 1    | 0.5  |
| Outcome - valid                    | 1     | 1     | 0.5  | 0.5  | 0.5  | 0.5  | 0.5  | 0.5   | 1    | 0.5  | 0.5  | 1    | 0.5  | 1    |
| Effect size                        | 1     | 1     | 1    | 1    | 1    | 1    | 1    | 1     | 1    | 1    | 1    | 1    | 1    | 1    |
| Mediator                           | 0     | 0.5   | 1    | 1    | 1    | 1    | 1    | 1     | 0    | 0    | 0.5  | 0.5  | 1    | 1    |
| Heterogeneity                      | 1     | 0.5   | 1    | 0    | 1    | 0    | 1    | 0     | 0    | 0.5  | 0    | 0    | 0    | 0    |
| Level of analysis                  | 1     | 1     | 1    | 1    | 1    | 1    | 1    | 1     | 1    | 1    | 1    | 1    | 1    | 1    |
| <b>SUM</b>                         | 11    | 10    | 12.5 | 10   | 11.5 | 11   | 12   | 10.5  | 10   | 10.5 | 9.5  | 10.5 | 10.5 | 10   |
